# Supplementary material for: Supply chain logistics – the role of the Golgi complex in extracellular matrix production and maintenance
Source: Oxford University Press journal article supplement (doi:10.1242/jcs.258879), 2022-01-01
Supplement: jcs258879supp.pdf [file jcs258879supp.pdf]

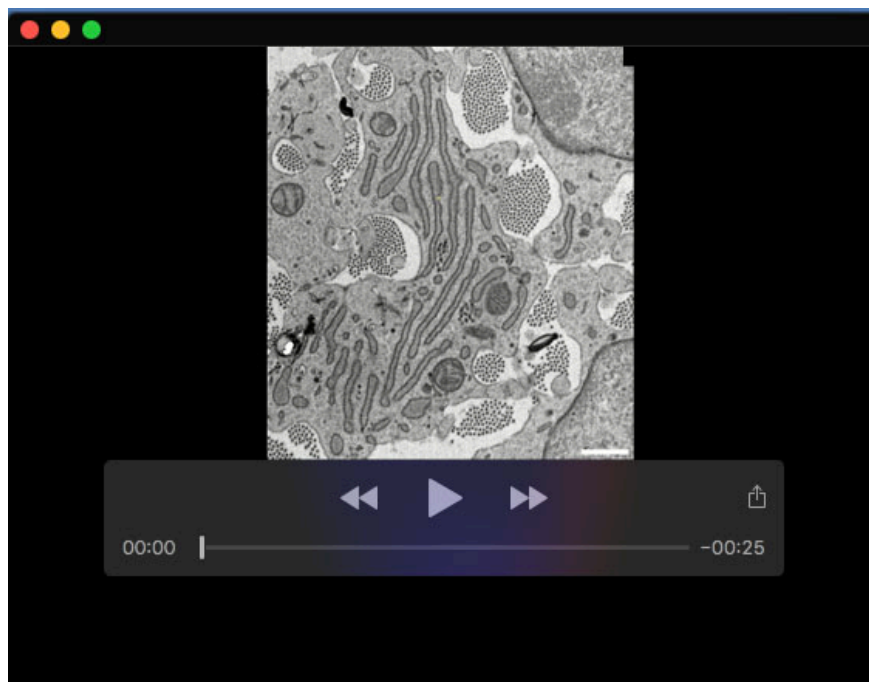

**Movie 1.** Serial block face scanning electron microscopy series through the Golgi region of mouse tendon fibroblasts at embryonic day 17. A still image from the series is shown Fig. 1A. The intervals are at 100 nm depth. Scale bar: 1  $\mu$ m.

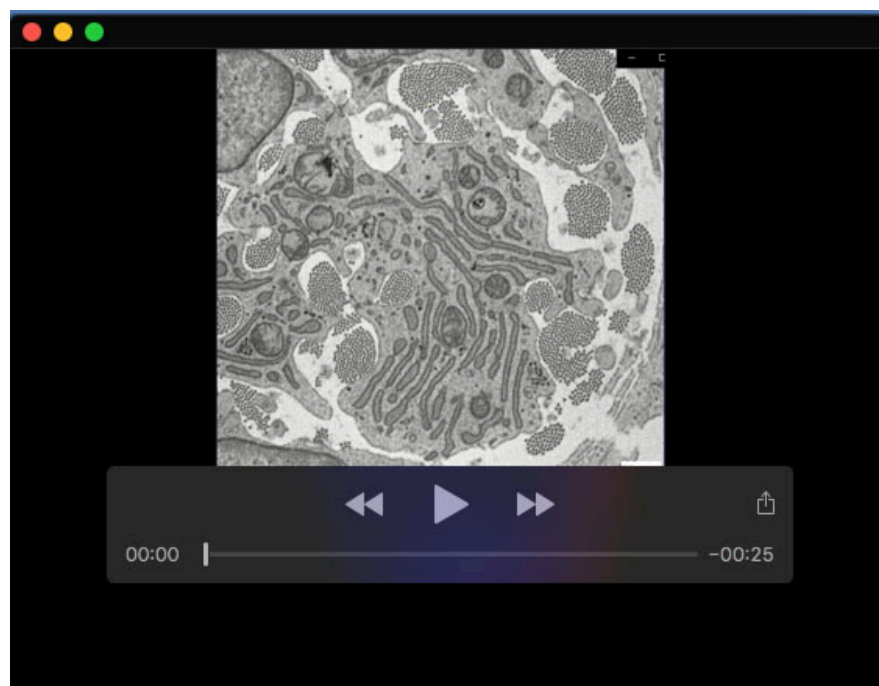

**Movie 2.** Serial block face scanning electron microscopy series through the Golgi region of mouse tendon fibroblasts at embryonic day 17. A still image from the series is shown Fig. 1B. The intervals are at 100 nm depth. Scale bar: 1  $\mu$ m.
